# Supplementary material
Source: HighWire-hosted journal article supplement (https://bmjopen.bmj.com/content/14/12/e089296)
Supplement: inline-supplementary-material-2 [file inline-supplementary-material-2.pdf]

Supplementary File 2

Searching terms:

|                           |                                                                                                                                                                                                                                                                                                                                                                                                                                                                                                                                                                          |
|---------------------------|--------------------------------------------------------------------------------------------------------------------------------------------------------------------------------------------------------------------------------------------------------------------------------------------------------------------------------------------------------------------------------------------------------------------------------------------------------------------------------------------------------------------------------------------------------------------------|
| Technology & sexual abuse | <ul style="list-style-type: none"><li>- Cyberbullying</li><li>- Cyberstalking</li><li>- Cybermob</li><li>- Deepfake</li><li>- Doxxing</li><li>- Image-based sexual abuse</li><li>- Non-image based sexual abuse</li><li>- Online grooming</li><li>- Online initiated physical sexual violence</li><li>- Online impersonation</li><li>- Online sexual harassment</li><li>- Online sexual violence/ abuse</li><li>- Revenge porn</li><li>- Sexting/ sextortion</li><li>- Shallowfake</li><li>- Technology-facilitated sexual violence/ abuse/ violence and abuse</li></ul> |
| Sexual abuse              | <ul style="list-style-type: none"><li>- Commercial sexual exploitation</li><li>- Child sexual abuse material</li><li>- Child pornography</li><li>- Intimate partner/ spousal/ domestic violence</li><li>- Rape</li><li>- Sexual abuse</li><li>- Sexual assault</li><li>- Sexual exploitation</li><li>- Sexual harassment</li><li>- Sexual offense</li><li>- Sexual violence</li><li>- Sexualized material</li></ul>                                                                                                                                                      |
| Technology                | <ul style="list-style-type: none"><li>- Blued</li></ul>                                                                                                                                                                                                                                                                                                                                                                                                                                                                                                                  |

|             |                                                                                                                                                                                                                                                                                                                                                                                                                    |
|-------------|--------------------------------------------------------------------------------------------------------------------------------------------------------------------------------------------------------------------------------------------------------------------------------------------------------------------------------------------------------------------------------------------------------------------|
|             | <ul style="list-style-type: none"><li>- Dating app</li><li>- Digital</li><li>- Grindr</li><li>- Image</li><li>- Image-based</li><li>- Livestream</li><li>- Online</li><li>- Social media</li><li>- Technology</li><li>- Technology-facilitated</li><li>- Tinder</li><li>- Technology-assisted</li><li>- Video</li><li>- Video game</li><li>- Web</li><li>- Web-based</li><li>- WhatsApp</li><li>- WeChat</li></ul> |
| Measurement | <ul style="list-style-type: none"><li>- Measurement</li><li>- Measure</li><li>- Scale</li><li>- Tool</li><li>- Instrument</li><li>- Index</li><li>- Validation</li><li>- Scale development</li><li>- Questionnaire</li><li>- Survey</li></ul>                                                                                                                                                                      |

Search strategy:

PubMed

| Set | Terms                                                                                                                                                                                                                                                                                                                                                                                                                              |
|-----|------------------------------------------------------------------------------------------------------------------------------------------------------------------------------------------------------------------------------------------------------------------------------------------------------------------------------------------------------------------------------------------------------------------------------------|
| #1  | Cyberbullying OR cyberstalking OR cybermob OR deepfake OR doxxing or image-based sexual abuse OR non-image-based sexual abuse OR online grooming OR online initiated physical sexual violence OR online impersonation OR online sexual harassment OR online sexual violence OR online sexual abuse OR online sexual exploitation OR revenge porn OR sexting OR sextortion OR shallowfake OR technology-facilitated sexual violence |
| #2  | Rape OR sexual abuse OR sexual assault OR sexual exploitation OR sexual harassment OR sexual offense OR sexual violence OR intimate partner violence OR spousal violence OR domestic violence OR sexualized material OR commercial sexual exploitation OR child sexual abuse material OR child pornography                                                                                                                         |
| #3  | Technology OR online OR web OR technology-facilitated OR web-based OR image OR image-based OR video OR WhatsApp OR WeChat OR Tinder OR Blued OR Grindr OR social media OR video game OR dating app OR livestream OR digital                                                                                                                                                                                                        |
| #4  | Measure [mesh] OR scale [mesh] OR questionnaire [mesh] OR survey [mesh] OR validation OR scale development OR index                                                                                                                                                                                                                                                                                                                |
| #5  | (#1 OR (#2 AND #3)) AND #4                                                                                                                                                                                                                                                                                                                                                                                                         |

Embase

| Set | Terms                                                                                                                                                                                                                                                                                                                                                                                                                                                                    |
|-----|--------------------------------------------------------------------------------------------------------------------------------------------------------------------------------------------------------------------------------------------------------------------------------------------------------------------------------------------------------------------------------------------------------------------------------------------------------------------------|
| #1  | ‘Cyberbullying’ OR ‘cyberstalking’ OR ‘cybermob’ OR ‘deepfake’ OR ‘doxxing’ or ‘image-based sexual abuse’ OR ‘non-image-based sexual abuse’ OR ‘online grooming’ OR ‘online initiated physical sexual violence’ OR ‘online impersonation’ OR ‘online sexual harassment’ OR ‘online sexual violence’ OR ‘online sexual abuse’ OR ‘online sexual exploitation’ OR ‘revenge porn’ OR ‘sexting’ OR ‘sextortion’ OR ‘shallowfake’ OR ‘technology-facilitated sexual violence’ |

|    |                                                                                                                                                                                                                                                                                                                                        |
|----|----------------------------------------------------------------------------------------------------------------------------------------------------------------------------------------------------------------------------------------------------------------------------------------------------------------------------------------|
| #2 | ‘rape’ OR ‘sexual abuse’ OR ‘sexual assault’ OR ‘sexual exploitation’ OR ‘sexual harassment’ OR ‘sexual offense’ OR ‘sexual violence’ OR ‘intimate partner violence’ OR ‘spousal violence’ OR ‘domestic violence’ OR ‘sexualized material’ OR ‘commercial sexual exploitation’ OR ‘child sexual abuse material’ OR ‘child pornography’ |
| #3 | ‘technology’ OR ‘online’ OR ‘web’ OR ‘technology-facilitated’ OR ‘web-based’ OR ‘image’ OR ‘image-based’ OR ‘video’ OR ‘WhatsApp’ OR ‘WeChat’ OR ‘Tinder’ OR ‘Blued’ OR ‘Grindr’ OR ‘social media’ OR ‘video game’ OR ‘livestream’ OR ‘digital’                                                                                        |
| #4 | Measur* OR scal* OR tool* OR instrument* OR question* OR survey* OR validat* OR scale development OR index                                                                                                                                                                                                                             |
| #5 | (#1 OR (#2 AND #3)) AND #4                                                                                                                                                                                                                                                                                                             |

CINAHL

| Set | Terms                                                                                                                                                                                                                                                                                                                                                                                                                                                                                         |
|-----|-----------------------------------------------------------------------------------------------------------------------------------------------------------------------------------------------------------------------------------------------------------------------------------------------------------------------------------------------------------------------------------------------------------------------------------------------------------------------------------------------|
| #1  | “cyberbully*” OR “ cyberstalk*” OR “cybermob” OR “doxing” OR “image-based sexual abuse” OR “non-image-based sexual abuse” OR “online initiated physical sexual violence” OR “technology-facilitated sexual violence” OR “technology-facilitated sexual abuse” OR “image-based sexual abuse” OR “online sexual violence” OR “online sexual harassment” OR “online sexual exploitation” OR “online sexual abuse” OR sext* OR “sextortion” OR “online groom*” OR “revenge porn” OR “shallowfake” |
| #2  | “sexual abuse” OR “sexual violence” OR “sexual harassment” OR “sexual exploitation” OR “rape” OR “sexual assault” OR “sexual offense” OR “intimate partner violence” OR “spousal violence” OR “domestic violence” OR “sexualized material” OR “commercial sexual exploitation” OR “child sexual abuse material” OR “child pornography”                                                                                                                                                        |
| #3  | “technology” OR “online” OR “web” OR “technology-facilitated” OR “web-based” OR “image” OR “image-based” OR “video” OR “WhatsApp” OR “WeChat” OR “Tinder” OR “Blued” OR “Grindr” OR “social media” OR “video game” OR “app” OR “livestream” OR “digital”                                                                                                                                                                                                                                      |
| #4  | Measur* OR scal* OR tool* OR instrument* OR question* OR survey*                                                                                                                                                                                                                                                                                                                                                                                                                              |

|    |                                           |
|----|-------------------------------------------|
|    | OR validat* OR scale development OR index |
| #5 | (#1 OR (#2 AND #3)) AND #4                |

Scopus

| Set | Terms                                                                                                                                                                                                                                                                                                                                                                                                                                                                                            |
|-----|--------------------------------------------------------------------------------------------------------------------------------------------------------------------------------------------------------------------------------------------------------------------------------------------------------------------------------------------------------------------------------------------------------------------------------------------------------------------------------------------------|
| #1  | TITLE-ABS-KEY (“technology-facilitated sexual violence” OR “technology-facilitated sexual abuse” OR “technology-facilitated gender-based violence”) OR TITLE-ABS-KEY (“cyberstalking” OR “cyberbullying” OR “cybermob”) OR TITLE-ABS-KEY (“online sexual violence” OR “online sexual harassment” OR “online sexual exploitation”) OR TITLE-ABS-KEY (“image-based sexual abuse” OR “sexting” OR “sextortion” OR “online grooming” OR “doxing” OR revenge porn” OR “deepfake” OR “shallowfake”) OR |
| #2  | ALL (sexual abuse OR sexual violence OR sexual harassment OR sexual exploitation OR sexual assault OR sexual offense OR rape OR commercial sexual exploitation) OR ALL (intimate partner violence OR spousal violence OR domestic violence) OR ALL (sexualized material OR child sexual abuse material OR child pornography OR sexualized material)                                                                                                                                              |
| #3  | ALL (technology OR online OR web OR technology-facilitated OR web-based OR digital) OR ALL (app OR WhatsApp OR WeChat OR Tinder OR Blued OR Grindr OR dating app OR social media OR video game OR livestream) OR ALL (image OR video)                                                                                                                                                                                                                                                            |
| #4  | ALL (measure* OR scale* OR tool* OR instrument*) OR ALL (questionnaire* OR survey* OR validat* OR scale development OR index)                                                                                                                                                                                                                                                                                                                                                                    |
| #5  | (#1 OR (#2 AND #3)) AND #4                                                                                                                                                                                                                                                                                                                                                                                                                                                                       |

ProQuest

| Set | Terms                                                                                                                                                                                                                                                                                                                                               |
|-----|-----------------------------------------------------------------------------------------------------------------------------------------------------------------------------------------------------------------------------------------------------------------------------------------------------------------------------------------------------|
| #1  | Cyberbullying OR cyberstalking OR cybermob OR deepfake OR doxxing or image-based sexual abuse OR non-image-based sexual abuse OR online grooming OR online initiated physical sexual violence OR online impersonation OR online sexual harassment OR online sexual violence OR online sexual abuse OR online sexual exploitation OR revenge porn OR |

|    |                                                                                                                                                                                                                                                                                                            |
|----|------------------------------------------------------------------------------------------------------------------------------------------------------------------------------------------------------------------------------------------------------------------------------------------------------------|
|    | sexting OR sextortion OR shallowfake OR technology-facilitated sexual violence                                                                                                                                                                                                                             |
| #2 | Rape OR sexual abuse OR sexual assault OR sexual exploitation OR sexual harassment OR sexual offense OR sexual violence OR intimate partner violence OR spousal violence OR domestic violence OR sexualized material OR commercial sexual exploitation OR child sexual abuse material OR child pornography |
| #3 | Technology OR online OR web OR technology-facilitated OR web-based OR image OR image-based OR video OR WhatsApp OR WeChat OR Tinder OR Blued OR Grindr OR social media OR video game OR livestream OR digital                                                                                              |
| #4 | measure* OR scale* OR tool* OR instrument* OR questionnaire* OR survey* OR validat* OR scale develop* OR index                                                                                                                                                                                             |
| #5 | (#1 OR (#2 AND #3)) AND #4                                                                                                                                                                                                                                                                                 |

Web of Science

| Set | Terms                                                                                                                                                                                                                                                                                                                                                                                                                                                                                                                                                 |
|-----|-------------------------------------------------------------------------------------------------------------------------------------------------------------------------------------------------------------------------------------------------------------------------------------------------------------------------------------------------------------------------------------------------------------------------------------------------------------------------------------------------------------------------------------------------------|
| #1  | TI= (“technology-facilitated sexual violence” OR “technology-facilitated sexual abuse” OR “technology-facilitated gender-based violence”) OR AB=(“technology-facilitated sexual violence” OR “technology-facilitated sexual abuse” OR “technology-facilitated gender-based violence”) OR AB= (“online sexual violence” OR “online sexual abuse” OR “online sexual harassment” OR “online sexual exploitation”) OR AB= (“image-based sexual abuse” OR “sexting” OR “sextortion” OR “online grooming” OR “revenge porn” OR “deepfake” OR “shallowfake”) |
| #2  | AB= (“sexual abuse” OR “sexual violence” OR “sexual harassment” OR “sexual exploitation” OR “sexual offense” OR “commercial sexual exploitation”) OR AB= (“intimate partner violence” OR “spousal violence” OR “domestic violence”) OR AB= (“sexualized material” OR “child sexual abuse material” OR “child pornography”)                                                                                                                                                                                                                            |
| #3  | AB= (“Technology” OR “online” OR “web” OR “technology-facilitated” OR “web-based” OR “image” OR “image-based” OR “video” OR “WhatsApp” OR “WeChat” OR “Tinder” OR “Blued” OR “Grindr” OR                                                                                                                                                                                                                                                                                                                                                              |

|    |                                                                                                                                    |
|----|------------------------------------------------------------------------------------------------------------------------------------|
|    | “social media” OR “video game” OR “livestream” OR “digital”)                                                                       |
| #4 | AB= (“measure*” OR “scale” OR “tool*” OR “instrument” OR “questionnaire” OR “survey” OR “validat*” OR “scale develop*” OR “index”) |
| #5 | (#1 OR (#2 AND #3)) AND #4                                                                                                         |

**Chinese National Knowledge Infrastructure**

#1  
Full Text (數位性暴力) OR Full Text (技術促進的性暴力) OR Full Text (網絡性暴力) OR Full Text (網絡性騷擾) OR Full Text (科技助長性暴力)

#2  
Full Text (量表) OR Full Text (量表編製) OR Full Text (信效度評估) OR Full Text (信效度分析) OR Full Text (問卷)

#3  
#1 AND #2

**SinoMed**

#1  
數位性暴力 OR 技術促進的性暴力 OR 網絡性暴力 OR 網絡性騷擾 OR 科技助長性暴力

#2  
量表 OR 量表編製 OR 信效度評估 OR 信效度分析 OR 問卷

#3  
#1 AND #2

**Index to Taiwan Periodical Literature**

#1  
數位性暴力 OR 技術促進的性暴力 OR 網絡性暴力 OR 網絡性騷擾 OR 科技助長性暴力

#2

量表 OR 量表編製 OR 信效度評估 OR 信效度分析 OR 問卷

#3

#1 AND #2

### Airiti Library

#1

[ALL3]=（影像性暴力）OR [ALL3]=（數位性暴力）OR [ALL3]=（技術促進的性暴力）OR [ALL3]=（技術促進的性暴力）OR [ALL3]=（網絡性暴力）OR [ALL3]=（網絡性騷擾）OR [ALL3]=（科技助長性暴力）

#2

[ALL]=（量表）OR [ALL]=（量表編製）OR [ALL]=（信效度評估）OR [ALL]=（信效度分析）OR [ALL]=（問卷）

#3

#1 AND #2
